# Supplementary material
Source: PubMed Central journal article supplement (PMC3486361)
Supplement: JB.01291-12_zjb999092118so1.pdf [file JB.01291-12_zjb999092118so1.pdf]

## SUPPLEMENTAL MATERIAL

### Directional Evolution of *Chlamydia trachomatis* Towards Niche-specific Adaptation

Vítor Borges, Alexandra Nunes, Rita Ferreira, Maria J. Borrego, and João P. Gomes

#### SUPPLEMENTAL TABLES

**TABLE S1** List of strains studied.

| Strain name                               | GenBank Accession number | Reference or source |
|-------------------------------------------|--------------------------|---------------------|
| <i>Chlamydia trachomatis</i> A/2497       | NC_016798                | 5                   |
| <i>Chlamydia trachomatis</i> A/363        | HE601796                 | 5                   |
| <i>Chlamydia trachomatis</i> A/5291       | HE601810                 | 5                   |
| <i>Chlamydia trachomatis</i> A/7249       | HE601797                 | 5                   |
| <i>Chlamydia trachomatis</i> A/Har13      | NC_007429                | 1                   |
| <i>Chlamydia trachomatis</i> B/TZ1A828/OT | NC_012687                | 10                  |
| <i>Chlamydia trachomatis</i> B/Jali20/OT  | NC_012686                | 10                  |
| <i>Chlamydia trachomatis</i> Ba/Apache-2  | --- <sup>a</sup>         | This publication    |
| <i>Chlamydia trachomatis</i> C/TW3        | --- <sup>a</sup>         | This publication    |
| <i>Chlamydia trachomatis</i> D/SotonD1    | HE601798                 | 5                   |
| <i>Chlamydia trachomatis</i> D/SotonD5    | HE601799                 | 5                   |
| <i>Chlamydia trachomatis</i> D/SotonD6    | HE601800                 | 5                   |
| <i>Chlamydia trachomatis</i> D/UW3        | NC_000117                | 12                  |
| <i>Chlamydia trachomatis</i> E/SW2        | FN652779                 | 14                  |
| <i>Chlamydia trachomatis</i> E/SW3        | HE601801                 | 5                   |
| <i>Chlamydia trachomatis</i> E/SotonE4    | HE601802                 | 5                   |
| <i>Chlamydia trachomatis</i> E/SotonE8    | HE601803                 | 5                   |
| <i>Chlamydia trachomatis</i> E/11023      | NC_017431                | 6                   |
| <i>Chlamydia trachomatis</i> E/150        | NC_017439                | 6                   |
| <i>Chlamydia trachomatis</i> E/Bour       | HE601870                 | 5                   |
| <i>Chlamydia trachomatis</i> F/SW4        | HE601804                 | 5                   |
| <i>Chlamydia trachomatis</i> F/SW5        | HE601805                 | 5                   |
| <i>Chlamydia trachomatis</i> F/SotonF3    | HE601806                 | 5                   |
| <i>Chlamydia trachomatis</i> F/IC-Cal3    | --- <sup>a</sup>         | This publication    |
| <i>Chlamydia trachomatis</i> G/9301       | NC_017432                | 6                   |
| <i>Chlamydia trachomatis</i> G/9768       | NC_017429                | 6                   |
| <i>Chlamydia trachomatis</i> G/11074      | NC_017440                | 6                   |
| <i>Chlamydia trachomatis</i> G/11222      | NC_017430                | 6                   |
| <i>Chlamydia trachomatis</i> G/SotonG1    | HE601807                 | 5                   |

|                                          |                  |                  |
|------------------------------------------|------------------|------------------|
| <i>Chlamydia trachomatis</i> G/UW57      | --- <sup>a</sup> | This publication |
| <i>Chlamydia trachomatis</i> H/UW43      | --- <sup>a</sup> | This publication |
| <i>Chlamydia trachomatis</i> I/UW12      | --- <sup>a</sup> | This publication |
| <i>Chlamydia trachomatis</i> Ia/SotonIa1 | HE601808         | 5                |
| <i>Chlamydia trachomatis</i> Ia/SotonIa3 | HE601809         | 5                |
| <i>Chlamydia trachomatis</i> J/6276      | ABYD01000001     | 6                |
| <i>Chlamydia trachomatis</i> J/UW36      | --- <sup>a</sup> | This publication |
| <i>Chlamydia trachomatis</i> K/SotonK1   | HE601794         | 5                |
| <i>Chlamydia trachomatis</i> K/UW31      | --- <sup>a</sup> | This publication |
| <i>Chlamydia trachomatis</i> L1/1322/p2  | HE601951         | 5                |
| <i>Chlamydia trachomatis</i> L1/115      | HE601952         | 5                |
| <i>Chlamydia trachomatis</i> L1/224      | HE601953         | 5                |
| <i>Chlamydia trachomatis</i> L1/440/LN   | HE601950         | 5                |
| <i>Chlamydia trachomatis</i> L2/25667R   | HE601954         | 5                |
| <i>Chlamydia trachomatis</i> L2/434/Bu   | NC_010287        | 13               |
| <i>Chlamydia trachomatis</i> L2b/UCH-1   | NC_010280        | 13               |
| <i>Chlamydia trachomatis</i> L2b/8200/07 | HE601795         | 5                |
| <i>Chlamydia trachomatis</i> L2b/UCH-2   | HE601956         | 5                |
| <i>Chlamydia trachomatis</i> L2b/Canada1 | HE601963         | 5                |
| <i>Chlamydia trachomatis</i> L2b/Canada2 | HE601957         | 5                |
| <i>Chlamydia trachomatis</i> L2b/LST     | HE601958         | 5                |
| <i>Chlamydia trachomatis</i> L2b/CV204   | HE601960         | 5                |
| <i>Chlamydia trachomatis</i> L2b/795     | HE601949         | 5                |
| <i>Chlamydia trachomatis</i> L2b/Ams1    | HE601959         | 5                |
| <i>Chlamydia trachomatis</i> L2b/Ams2    | HE601961         | 5                |
| <i>Chlamydia trachomatis</i> L2b/Ams3    | HE601962.1       | 5                |
| <i>Chlamydia trachomatis</i> L2b/Ams4    | HE601964.1       | 5                |
| <i>Chlamydia trachomatis</i> L2b/Ams5    | HE601965.1       | 5                |
| <i>Chlamydia trachomatis</i> L2c         | NC_015744        | 11               |
| <i>Chlamydia trachomatis</i> L3/404/LN   | HE601955         | 5                |
| <i>Chlamydia muridarum</i> Nigg          | NC_002620        | 9                |

<sup>a</sup> As these historical prototype strains were not fully-sequenced so far, we amplified and sequenced the 75 genes under evaluation. The obtained nucleotide sequences have the GenBank accession numbers: JQ066324 - JQ066722.

**TABLE S2** Identification of genes and corresponding functional category.

| ORF (gene) <sup>a</sup> | Functional category <sup>b</sup> |
|-------------------------|----------------------------------|
| CT048 ( <i>yraL</i> )   | HK                               |
| CT049                   | other                            |
| CT050                   | other                            |
| CT051                   | other                            |
| CT058                   | SEC                              |
| CT059 ( <i>fer</i> )    | HK                               |

|                                     |       |
|-------------------------------------|-------|
| CT105                               | other |
| CT115 ( <i>incD</i> )               | SEC   |
| CT116 ( <i>incE</i> )               | SEC   |
| CT117 ( <i>incF</i> )               | SEC   |
| CT118 ( <i>incG</i> )               | SEC   |
| CT119 ( <i>incA</i> )               | SEC   |
| CT143                               | other |
| CT144                               | other |
| CT147                               | SEC   |
| CT192                               | SEC   |
| CT195                               | SEC   |
| CT214                               | SEC   |
| CT222                               | SEC   |
| CT223                               | SEC   |
| CT228                               | SEC   |
| CT229                               | SEC   |
| CT232 ( <i>incB</i> )               | SEC   |
| CT233 ( <i>incC</i> )               | SEC   |
| CT249                               | SEC   |
| CT288                               | SEC   |
| CT293 ( <i>accD</i> )               | HK    |
| CT365                               | SEC   |
| CT383                               | SEC   |
| CT412 ( <i>pmpA</i> )               | CEP   |
| CT413 ( <i>pmpB</i> )               | CEP   |
| CT414 ( <i>pmpC</i> )               | CEP   |
| CT442 ( <i>crpA</i> )               | SEC   |
| CT443 ( <i>omcB</i> )               | CEP   |
| CT456 ( <i>tarp</i> )               | SEC   |
| CT529                               | SEC   |
| CT618                               | SEC   |
| CT622                               | SEC   |
| CT623                               | other |
| CT624 ( <i>mviN</i> )               | CEP   |
| CT653 ( <i>yhbG</i> )               | HK    |
| CT674 ( <i>yscC</i> )               | HK    |
| CT675 ( <i>karG</i> )               | HK    |
| CT676                               | other |
| CT677 ( <i>frr</i> )                | HK    |
| CT678 ( <i>pyrH</i> )               | HK    |
| CT679 ( <i>tsf</i> )                | HK    |
| CT680 ( <i>rs2</i> or <i>rpsB</i> ) | HK    |
| CT681 ( <i>ompA</i> )               | CEP   |
| CT682 ( <i>pbpB</i> )               | CEP   |
| CT683 ( <i>TPR motif-protein</i> )  | other |

|                         |       |
|-------------------------|-------|
| CT684                   | HK    |
| CT685                   | HK    |
| CT686 ( <i>sufD</i> )   | HK    |
| CT687 ( <i>yfhO_1</i> ) | HK    |
| CT688 ( <i>parB</i> )   | HK    |
| CT689 ( <i>dppF</i> )   | HK    |
| CT694                   | SEC   |
| CT760 ( <i>ftsW</i> )   | HK    |
| CT783                   | other |
| CT812 ( <i>pmpD</i> )   | CEP   |
| CT813                   | SEC   |
| CT818 ( <i>tyrP_2</i> ) | HK    |
| CT852 ( <i>yhgN</i> )   | CEP   |
| CT859 ( <i>ispH</i> )   | HK    |
| CT860                   | SEC   |
| CT861                   | SEC   |
| CT862 ( <i>lcrH_2</i> ) | HK    |
| CT867                   | SEC   |
| CT868                   | SEC   |
| CT869 ( <i>pmpE</i> )   | CEP   |
| CT870 ( <i>pmpF</i> )   | CEP   |
| CT871 ( <i>pmpG</i> )   | CEP   |
| CT872 ( <i>pmpH</i> )   | CEP   |
| CT874 ( <i>pmpI</i> )   | CEP   |

<sup>a</sup> Open reading frame (ORF) numbers are based on the D/UW3 strain genome annotation (GenBank accession number NC\_000117).

<sup>b</sup> The 75 genes under evaluation were categorized according to their functional role: housekeeping genes (HKs), genes encoding well-known cell envelope proteins (CEPs), genes coding for proteins secreted into the cytosol of the host cells or to the inclusion membrane (SEC), and genes encoding proteins with unknown function or with non-consensual biological role (classified as “other”).

**TABLE S3** Oligonucleotide primers used for PCR and sequencing.

| ORF (gene) <sup>a</sup> | Primer <sup>a</sup>         | Primer sequence (5' to 3') <sup>a</sup> | Primer location <sup>a</sup> | Amplicon size (bp) <sup>a</sup> |
|-------------------------|-----------------------------|-----------------------------------------|------------------------------|---------------------------------|
| CT048 ( <i>yraL</i> )   | CT048-1 <sup>b</sup>        | GAGCCGGCTCTTTTAAATGGTTT                 | 53104 - 53126                | 1059                            |
|                         | CT048-2 <sup>b</sup>        | GTCGACGGAACAGACGAAGAAA                  | 54141 - 54162                |                                 |
| CT049 <sup>c</sup>      | ---                         | ---                                     | ---                          | ---                             |
| CT050/CT051             | CT050/51-1A <sup>d, e</sup> | TGGGCGCTGGTTATTA ACTATTTG               | 377806 - 377829              | 3704                            |
|                         | CT050/51-2A <sup>b, e</sup> | GACCCCATCCCCTTTGGAGT                    | 381490 - 381509              |                                 |
|                         | CT050/51-1D <sup>b</sup>    | ACAAAGCGCTTTCAGA ACATACAT               | 55452 - 55475                | 3589                            |
|                         | CT050/51-2D <sup>b</sup>    | AGGGCGTCTTTTTCATGATTCTAT                | 59017 - 59040                |                                 |
|                         | CT050/51-1 <sup>f</sup>     | CTAAGAGTTATGTAGCTATC                    | 55542 - 55561                |                                 |
|                         | CT050/51-1S <sup>f</sup>    | AGTTAAGGGAGAGAATCTC                     | 55593 - 55611                |                                 |
|                         | CT050/51-3 <sup>f</sup>     | TTGTAGTGTGCAAGATTGTC                    | 55857 - 55876                |                                 |
|                         | CT050/51-4 <sup>f</sup>     | TTGTGCCACTACAATACCTT                    | 58726 - 58745                |                                 |
|                         | CT050/51-5 <sup>f</sup>     | AACCTTTCCAATATCACCGT                    | 56566 - 56585                |                                 |
|                         | CT050/51-6 <sup>f</sup>     | GCACAGATCGCCAATATCAA                    | 58076 - 58095                |                                 |

|                                     |                         |                           |                  |      |
|-------------------------------------|-------------------------|---------------------------|------------------|------|
|                                     | CT050/51-7 <sup>f</sup> | AGTCACTCCAGACAATTCTA      | 57699 - 57718    |      |
|                                     | CT050/51-8 <sup>f</sup> | TTAGTGAGACAGGCATTGA       | 57160 - 57178    |      |
| CT058/CT059<br>( <i>fer</i> )       | CT058/9-1 <sup>b</sup>  | AGTACCGGCCGAATCTCTTTCTCC  | 67315 - 67338    | 1634 |
|                                     | CT058/9-2 <sup>b</sup>  | GTCGGGGGTTCTGAATCCCTCTA   | 68927 - 68948    |      |
|                                     | CT058/9-3 <sup>f</sup>  | TCTCATTACTTCTCTTGCGT      | 68432 - 68451    |      |
| CT115-118 <sup>g</sup>              | ---                     | ---                       | ---              | ---  |
| CT119 ( <i>incA</i> )               | CT119-1 <sup>b</sup>    | GGGGCATTTCGATGATATAAATAAG | 136695 - 136718  | 1273 |
|                                     | CT119-2 <sup>b</sup>    | TGCACTGCGCAGACAAGAA       | 137949 - 137967  |      |
| CT143                               | CT143-1 <sup>b</sup>    | AAGGGCGGAGACTATGTGGACA    | 159770 - 159791  | 1325 |
|                                     | CT143-2 <sup>b</sup>    | AGCGCTGAACGCATACTTATTTTA  | 161071 - 161094  |      |
| CT144 <sup>g</sup>                  | ---                     | ---                       | ---              | ---  |
| CT147 <sup>h</sup>                  | CT147-1 <sup>b</sup>    | GGGGAAAGTGAGCTCTTCGGTATC  | 165430 - 165453  | 2819 |
|                                     | CT147-2 <sup>b</sup>    | CGCCGCTACAACAGCTTTAGTGA   | 168226 - 168248  |      |
|                                     | CT147-3 <sup>b</sup>    | ATTGCGTCCCAAGATATACGACAG  | 167928 - 167951  | 2294 |
|                                     | CT147-4 <sup>b</sup>    | CACGCCAACCCAGAATCCTT      | 170202 - 170221  |      |
|                                     | CT147-5 <sup>f</sup>    | TAATCATCCACTAGAAGCG       | 166229 - 166247  |      |
|                                     | CT147-6 <sup>f</sup>    | TGTTCTAGCTGCTCTTGAAT      | 167649 - 167668  |      |
|                                     | CT147-7 <sup>f</sup>    | TGGATGGTGTGTCAGAATTA      | 168511 - 168530  |      |
|                                     | CT147-8 <sup>f</sup>    | TACCTCTAGATGTTTTGCGT      | 169786 - 169805  |      |
| CT192                               | CT192-1 <sup>b</sup>    | ATATGCGCAAGCACACCTTCC     | 215717 - 215737  | 1016 |
|                                     | CT192-2 <sup>b</sup>    | CTGGGCGTCCATTACACAACA     | 216713 - 216732  |      |
|                                     | CT192-3 <sup>f</sup>    | CGTATCGATTCCCTTCTTCTA     | 215998 - 216017  |      |
|                                     | CT192-4 <sup>f</sup>    | CTCCTCTTATTGAAGAAGCT      | 2156196 - 216215 |      |
| CT195                               | CT195-1 <sup>b</sup>    | CCTCCGCCTAATCCTCGACTACAT  | 219655 - 216678  | 1320 |
|                                     | CT195-2 <sup>b</sup>    | CCAGCGGTTGATATTTCTTGATTA  | 220951 - 220974  |      |
| CT214                               | CT214-1 <sup>b</sup>    | AGGGCTTCTATTCCTCAAACAGTA  | 241463 - 241486  | 1797 |
|                                     | CT214-2 <sup>b</sup>    | TTCCCCGTTCTAAAGATCAGTTAT  | 243236 - 243259  |      |
|                                     | CT214-3 <sup>f</sup>    | AACAGCCTGGATCTATATCA      | 242027 - 242046  |      |
| CT223                               | CT223-1 <sup>b</sup>    | GCAACGCATATCGCTCCTCA      | 251102 - 251121  | 1308 |
|                                     | CT223-2 <sup>b</sup>    | GTGCGCCCCTTCTCGTAAAG      | 252390 - 252409  |      |
| CT228/CT229                         | CT228/9-1 <sup>b</sup>  | CGGTCCC GGATTATCAAACAAGT  | 254667 - 254690  | 1816 |
|                                     | CT228/9-2 <sup>b</sup>  | ATGCGGCCATCCCAGAAGC       | 256464 - 256482  |      |
|                                     | CT228/9-3 <sup>f</sup>  | AGATTACGCAAACGTTGCTC      | 255033 - 255052  |      |
|                                     | CT228/9-4 <sup>f</sup>  | GTTGTGATTGCAGCAGTAG       | 255972 - 255990  |      |
| CT232/CT233<br>( <i>incB/incC</i> ) | CT232/3-1 <sup>b</sup>  | GATTAGGCGGAGGGGTTCTCTT    | 259223 - 259244  | 1262 |
|                                     | CT232/3-2 <sup>b</sup>  | CTCTCCGCGACGCAAATAAG      | 260464 - 260484  |      |
| CT249                               | CT249-1 <sup>b</sup>    | ACCACCCTTTAGCCATCCATTCC   | 279170 - 279192  | 704  |
|                                     | CT249-2 <sup>b</sup>    | AATTGCGCCGCCTCCTTGTA      | 279854 - 279873  |      |
| CT288                               | CT288-1 <sup>b</sup>    | TTTTACGCACAATGAACCCAGAAA  | 321582 - 321605  | 2063 |
|                                     | CT288-2 <sup>b</sup>    | CGGGCTCCTCGGGAACAG        | 323627 - 323644  |      |
|                                     | CT288-3 <sup>f</sup>    | TTACCTGACCTCAGACACC       | 322164 - 322182  |      |
|                                     | CT288-4 <sup>f</sup>    | GTCAGCTCGTCGTTTATTG       | 323121 - 323139  |      |
| CT293 ( <i>accD</i> )               | CT293-1 <sup>b</sup>    | TGCGCCAGAAGCTCCAGAAGTAGC  | 326322 - 326345  | 1350 |
|                                     | CT293-2 <sup>b</sup>    | AGGATCTGGCTGGGGATGGTTAGC  | 327648 - 327671  |      |
| CT365                               | CT365-1 <sup>b</sup>    | AAATTCGCAAACCTTGCTCTTTTC  | 416102 - 416125  | 2213 |
|                                     | CT365-2 <sup>b</sup>    | GATCGGGATTCCCCTGGATA      | 418295 - 418314  |      |
|                                     | CT365-3 <sup>f</sup>    | CTAACTTCCAAGTTTCCTCT      | 416572 - 416591  |      |
|                                     | CT365-4 <sup>f</sup>    | CTCATTGCAGGTATTGTTGT      | 417720 - 417739  |      |
| CT412 ( <i>pmpA</i> ) <sup>i</sup>  | ---                     | ---                       | ---              | ---  |
| CT413 ( <i>pmpB</i> ) <sup>i</sup>  | ---                     | ---                       | ---              | ---  |
| CT414 ( <i>pmpC</i> ) <sup>j</sup>  | ---                     | ---                       | ---              | ---  |
| CT442 ( <i>crpA</i> )               | CT442-1 <sup>b</sup>    | CTCCTCCCTTTCCATACATCATCT  | 511256 - 511279  | 783  |
|                                     | CT442-2 <sup>b</sup>    | AAGCGATTCTTCTTCCGATACAT   | 512015 - 512038  |      |

|                                                     |                        |                          |                 |      |
|-----------------------------------------------------|------------------------|--------------------------|-----------------|------|
| CT443 ( <i>omcB</i> ) <sup>k</sup>                  | ---                    | ---                      | ---             | ---  |
| CT456 ( <i>tarp</i> )                               | CT456-1 <sup>b</sup>   | ACAAACGTTACCCGGTATGCTGTT | 530723 - 530746 | 3362 |
|                                                     | CT456-2 <sup>b</sup>   | TTGCGCCTTGTGCGATTGTGAT   | 534064 - 534084 |      |
|                                                     | CT456-3 <sup>f</sup>   | TACCTCATCAAGCGATCATA     | 531252 - 531271 |      |
|                                                     | CT456-4 <sup>f</sup>   | CCACCAGTTGTTATTATGTC     | 533470 - 533489 |      |
|                                                     | CT456-5 <sup>f</sup>   | AGACATGTCTCTTCCTTCAT     | 531867 - 531886 |      |
|                                                     | CT456-6 <sup>f</sup>   | TACATCAGAGATTACGTCTC     | 532889 - 532908 |      |
|                                                     | CT456-7 <sup>f</sup>   | GAGTTTCATTGGAGAAGGAA     | 532413 - 532432 |      |
|                                                     | CT456-8 <sup>f</sup>   | CGTTACCCGGTATGCTGTT      | 530728 - 530746 |      |
|                                                     | CT456-9 <sup>f</sup>   | TACAAACACTACTGCCTTCA     | 533363 - 533382 |      |
|                                                     | CT456-10 <sup>f</sup>  | TTGTTACTACCTACGTCATC     | 531328 - 531347 |      |
|                                                     | CT456-11 <sup>f</sup>  | CTAATTAATCGGCTGTTG       | 530869 - 530887 |      |
| CT529                                               | CT529-1 <sup>b</sup>   | ACGCGGCTCCTTAAAGCAAACAA  | 596464 - 596486 | 1659 |
|                                                     | CT529-2 <sup>b</sup>   | CGCGCATATCCGGGGAGTCT     | 598103 - 598122 |      |
|                                                     | CT529-3 <sup>f</sup>   | TCTCGCAAGCATTTCCTCT      | 596984 - 597003 |      |
| CT618                                               | CT618-1 <sup>b</sup>   | TCCCGATATGCCTCCTTTTGAGTC | 698080 - 698103 | 1360 |
|                                                     | CT618-2 <sup>b</sup>   | ATGCGCACGCAAGCCAATC      | 699421 - 699439 |      |
| CT622                                               | CT622-1 <sup>b</sup>   | GGCTCCCCCTCAATTCACAAACTT | 707046 - 707069 | 2319 |
|                                                     | CT622-2 <sup>b</sup>   | GGTCGCGGAAACCAAATGAAATA  | 709342 - 709364 |      |
|                                                     | CT622-3 <sup>f</sup>   | TGATTGCTTGTATTTCCGGCT    | 707784 - 707803 |      |
|                                                     | CT622-4 <sup>f</sup>   | TTCAGCATCGTCCTCTGTAA     | 708885 - 708904 |      |
|                                                     | CT622-5 <sup>f</sup>   | AGAAGAGATTATGCAGAAGC     | 707298 - 707317 |      |
| CT623                                               | CT623-1 <sup>b</sup>   | TTTGCCATTAATAATTGGATTCA  | 708957 - 708980 | 1516 |
|                                                     | CT623-2 <sup>b</sup>   | CATGGGTCGGTTGTATGAGATGT  | 710450 - 710472 |      |
| CT624 ( <i>mviN</i> )                               | CT624-1 <sup>b</sup>   | ATCGAGCGCGGACATCTCC      | 710225 - 710243 | 2326 |
|                                                     | CT624-2 <sup>b</sup>   | GATATCGCGCCCTTCGTAAGA    | 712529 - 712550 |      |
|                                                     | CT624-3 <sup>f</sup>   | CTAAAGGTTTGTGGGACT       | 710827 - 710846 |      |
|                                                     | CT624-4 <sup>f</sup>   | ACGTGCGCAAATATTTCTC      | 712033 - 712052 |      |
| CT653 ( <i>yhbG</i> )                               | CT653-1 <sup>b</sup>   | AGCCGCGATAGCTAACGAAGTG   | 750194 - 750215 | 922  |
|                                                     | CT653-2 <sup>b</sup>   | GAAGGCGGAATGAAAGTCCTCTC  | 751093 - 751115 |      |
| CT674 ( <i>yscC</i> )                               | CT674-1 <sup>b</sup>   | TTTCAAGCGGAATCGCAAGGAAT  | 770234 - 770256 | 3229 |
|                                                     | CT674-2 <sup>b</sup>   | CCGGGATCGAACCGACGAC      | 773444 - 773462 |      |
|                                                     | CT674-3 <sup>f</sup>   | AGAGCCATCAGATTTTCTCT     | 770846 - 770865 |      |
|                                                     | CT674-4 <sup>f</sup>   | AGAGGAAGAGAAGTACTGAGTAA  | 772996 - 773015 |      |
|                                                     | CT674-5 <sup>f</sup>   | ATGACTTGAAAAGTCGTTGAA    | 771470 - 771489 |      |
|                                                     | CT674-6 <sup>f</sup>   | TCCGTACATCATACTACTGA     | 772505 - 772524 |      |
|                                                     | CT674-7 <sup>f</sup>   | GATATCGGAGTCAATCTTGTT    | 772771 - 772791 |      |
| CT675 ( <i>karG</i> )/<br>CT676                     | CT675/6-1 <sup>b</sup> | CCCGGCTTTGGGCATTCC       | 773458 - 773475 | 1933 |
|                                                     | CT675/6-2 <sup>b</sup> | TCATTCCGGTAACAGGGGTTCCG  | 775369 - 775390 |      |
|                                                     | CT675/6-3 <sup>f</sup> | CGTGATCAGATTAATCAGCT     | 774669 - 774688 |      |
| CT677/CT678/<br>CT679                               | CT677/9-1 <sup>b</sup> | ATGGGGCCAGGACGGGTCTA     | 775420 - 775439 | 2393 |
|                                                     | CT677/9-2 <sup>b</sup> | AAATTTTATCTCCGGTGCCTCCTG | 777789 - 777812 |      |
| ( <i>frr</i> , <i>pyrH</i> , <i>tsf</i> )           | CT677/9-4 <sup>f</sup> | GAAGATATCACTGTACCAAC     | 776088 - 776107 |      |
|                                                     | CT677/9-5 <sup>f</sup> | TGGCTAAAGACATTGCTATG     | 777107 - 777126 |      |
| CT680 ( <i>rs2</i> or<br><i>rpsB</i> ) <sup>c</sup> | ---                    | ---                      | ---             | ---  |
| CT681 ( <i>ompA</i> ) <sup>j</sup>                  | ---                    | ---                      | ---             | ---  |
| CT682 ( <i>pbpB</i> ) <sup>h</sup>                  | pbpB-1 <sup>b, c</sup> | ---                      | ---             | ---  |
|                                                     | pbpB-2 <sup>b, c</sup> | ---                      | ---             | ---  |
|                                                     | CT682-1 <sup>b</sup>   | GCATTGTGATCGCGCAGGAGTA   | 780841 - 780862 | 3149 |
|                                                     | CT682-2 <sup>b</sup>   | TTTCCGCCTCTTCCATAGTCGTT  | 783966 - 783989 |      |
|                                                     | CT682-3 <sup>f</sup>   | TTGATAGGCAAGCGATCTAT     | 781484 - 781503 |      |
|                                                     | CT682-4 <sup>f</sup>   | ATATTCTCCAGGAAGTCCTA     | 783318 - 783337 |      |

|                                         |                         |                           |                   |      |
|-----------------------------------------|-------------------------|---------------------------|-------------------|------|
|                                         | CT682-5 <sup>f</sup>    | TGGAAATGTTTGAGTGTGAA      | 782079 - 782098   |      |
| CT683 ( <i>TPR-motif protein</i> )      | CT683-1 <sup>b</sup>    | TCGCTGCGGTAGGATATGAAGATG  | 783756 - 783779   | 1702 |
|                                         | CT683-2 <sup>b</sup>    | TCGCCGCGTAAATGAACCAAT     | 785437 - 785457   |      |
|                                         | CT683-3 <sup>f</sup>    | GACTGTCAAACAGCCCTTAA      | 785108 - 785127   |      |
| CT684 <sup>h</sup>                      | CT684-A1 <sup>b</sup>   | TGGGCATTACAATCTTGGGTTATG  | 784615 - 784638   | 1471 |
|                                         | CT684-A2 <sup>b</sup>   | AACAGCGGCATGCAGTTGATG     | 786065 - 786085   |      |
|                                         | CT684-B1 <sup>b</sup>   | ATTTCTGGGAGGCAATCCACAAT   | 785785 - 785806   | 1398 |
|                                         | CT684-B2 <sup>b</sup>   | TCCCGGGAATCCATATACCTCTTC  | 787159 - 787182   |      |
| CT685/CT686                             | CT684-A3 <sup>f</sup>   | TCATCAATAGGGATGCCTAA      | 785651 - 785670   |      |
|                                         | CT684-A4 <sup>f</sup>   | TCTGGATCTGCGTCTTCTAA      | 785609 - 785628   |      |
|                                         | CT685/6-1 <sup>b</sup>  | GCTCGGGAAGCAACCAAGTTATTA  | 786722 - 786745   | 2386 |
|                                         | CT685/6-2 <sup>b</sup>  | AAGCGAGTCCCATGATACGAGAT   | 789084 - 789107   |      |
| CT687<br>( <i>yfhO_1</i> ) <sup>g</sup> | CT685/6-3 <sup>f</sup>  | TCTTGATGTCGATGCTTTGA      | 787308 - 787327   |      |
|                                         | CT685/6-4 <sup>f</sup>  | ATGCAGAAGCTCGATTACTT      | 788502 - 788521   |      |
| CT688 ( <i>parB</i> ) <sup>g</sup>      | ---                     | ---                       | ---               | ---  |
| CT689 ( <i>dppF</i> ) <sup>g</sup>      | ---                     | ---                       | ---               | ---  |
| CT694                                   | CT694-1 <sup>b</sup>    | TACAGGGGGAGGCGCTTCCTTA    | 796071 - 796092   | 1541 |
|                                         | CT694-2 <sup>b</sup>    | CGCGCTCTTCTAGCTCTCCCTCTT  | 796528 - 797551   |      |
|                                         | CT694-3 <sup>f</sup>    | GATAACTCTTAACCCCATTTG     | 796267 - 796286   |      |
| CT760 ( <i>ftsW</i> )                   | CT760-1 <sup>b</sup>    | CTTGGGCCATTGCATTGAGTAAT   | 892695 - 892717   | 1417 |
|                                         | CT760-2 <sup>b</sup>    | CCCCAGAGAACATCCGATTGAC    | 894090 - 894111   |      |
|                                         | CT760-3 <sup>f</sup>    | AGGATGTAGGTAAACTTGCA      | 893445 - 893464   |      |
| CT783                                   | CT783-1 <sup>b</sup>    | AGCGGGGATTTCAGCATTCT      | 919328 - 919347   | 1427 |
|                                         | CT783-2 <sup>b</sup>    | TGCCCTCGCTCTTCATC         | 920676 - 920694   |      |
|                                         | CT783-3 <sup>f</sup>    | TGTCAATACCTCCCTAGTT       | 919913 - 919932   |      |
| CT812 ( <i>pmpD</i> ) <sup>i</sup>      | ---                     | ---                       | ---               | ---  |
| CT813                                   | CT813-1 <sup>b</sup>    | CTGCGTGTGCTCTGGAAAATAAT   | 954988 - 955011   | 1460 |
|                                         | CT813-2 <sup>b</sup>    | AGGCCGAGCCCTACTCAAAAAT    | 956365 - 956387   |      |
| CT818 ( <i>tyrP_2</i> )                 | CT818-1 <sup>b</sup>    | CCTGGCGGGAAAGGGACTCT      | 961600 - 961619   | 1531 |
|                                         | CT818-2 <sup>b</sup>    | GCGCATAATCGCGATCATAACAATC | 963107 - 963130   |      |
|                                         | CT818-3 <sup>f</sup>    | GAATAGCACGTTTAAACCTCA     | 962512 - 962531   |      |
| CT852 ( <i>yhgN</i> )                   | CT852-1 <sup>b</sup>    | CTGCCGCACCAGCAAGGAT       | 1001213 - 1001231 | 768  |
|                                         | CT852-2 <sup>b</sup>    | TAGGCGCTCAACTTCTGGTATCTG  | 1001957 - 1001980 |      |
| CT859 ( <i>ispH</i> )/<br>CT860         | CT856/60-1 <sup>b</sup> | GAGGGGGCTTTGCGGATTTAT     | 1011689 - 1011709 | 2779 |
|                                         | CT856/60-2 <sup>b</sup> | CCGGAATGCTTGGCTTGACA      | 1014448 - 1014467 |      |
|                                         | CT856/60-3 <sup>f</sup> | ACGACATTGAGTATGGATGA      | 1012253 - 1012272 |      |
|                                         | CT856/60-4 <sup>f</sup> | ACCCGATATCTCATAAATC       | 1013829 - 1013848 |      |
| CT861/CT862<br>( <i>lcrH_2</i> )        | CT856/60-5 <sup>f</sup> | GTATTTTCAGTTGCCTAAGGA     | 1012658 - 1012677 |      |
|                                         | CT861/2-1 <sup>d</sup>  | GAGGGCAGAGGCTTCTTCAACAAG  | 1014122 - 1014144 | 2400 |
|                                         | CT861/2-2 <sup>b</sup>  | CTAGGCGTCCCAATTGGAGACTC   | 1016499 - 1016521 |      |
|                                         | CT861/2-3 <sup>f</sup>  | AATAGCTCTCCAACCATCAA      | 1014640 - 1014659 |      |
|                                         | CT861/2-4 <sup>f</sup>  | GACTATGAGGAAAGTTCTAC      | 1016071 - 1016090 |      |
|                                         | CT861/2-5 <sup>f</sup>  | TCTCCTGTTGCTATTGTTTG      | 1014159 - 1014178 |      |
| CT867/CT868                             | CT861/2-6 <sup>f</sup>  | TTGACTTTCTCCTGATGCTT      | 1015102 - 1015121 |      |
|                                         | CT867/8-1 <sup>d</sup>  | TCCCGACTGCTGGGGCTTAGA     | 1022902 - 1022922 | 2889 |
|                                         | CT867/8-2 <sup>d</sup>  | CATCGCGTCATGCCATGTCCTAT   | 1025768 - 1025790 |      |
|                                         | CT867/8-3 <sup>f</sup>  | TCCTTCAGCTACTCTGATT       | 1022935 - 1022953 |      |
|                                         | CT867/8-4 <sup>f</sup>  | TGGTAAGCGGATTACAGAT       | 1023641 - 1023659 |      |
|                                         | CT867/8-5 <sup>f</sup>  | TTCATGGCGTTCTACAGAAT      | 1024302 - 1024321 |      |
|                                         | CT867/8-6 <sup>f</sup>  | AATGTCAGAATCCCAAGCA       | 1024923 - 1024941 |      |
| CT867/8-7 <sup>f</sup>                  | AGAGGGGAAGTCTTAATTTCC   | 1025542 - 1025561         |                   |      |

|                                    |     |     |     |     |
|------------------------------------|-----|-----|-----|-----|
| CT869 ( <i>pmpE</i> ) <sup>i</sup> | --- | --- | --- | --- |
| CT870 ( <i>pmpF</i> ) <sup>i</sup> | --- | --- | --- | --- |
| CT871 ( <i>pmpG</i> ) <sup>i</sup> | --- | --- | --- | --- |
| CT872 ( <i>pmpH</i> ) <sup>i</sup> | --- | --- | --- | --- |
| CT874 ( <i>pmpI</i> ) <sup>i</sup> | --- | --- | --- | --- |

<sup>a</sup> Open reading frame (ORF) numbers, primer location (genome coordinates), primer sequences and amplicon size are based on the D/UW3 strain genome annotation (GenBank accession number NC\_000117).

<sup>b</sup> Amplification primers also used for automated sequencing.

<sup>c</sup> Previously described (3).

<sup>d</sup> Primers exclusively used for PCR amplification.

<sup>e</sup> Primer sequences, location and amplicon size refers to the L2/434 strain genome annotation (GenBank accession number NC\_010287) as these primers were designed for amplification and automated sequencing in LGV and ocular strains, and they have no homology in the D/UW3 genome sequence.

<sup>f</sup> Primers exclusively used for automated sequencing.

<sup>g</sup> Previously described (8).

<sup>h</sup> Due to the large gene size (for CT147 and CT682) or for PCR optimization (for CT684), two PCR primer pairs were designed to generate two overlapping amplicons for the entire gene.

<sup>i</sup> Previously described (4).

<sup>j</sup> Previously described (2).

<sup>k</sup> Previously described (7).

## REFERENCES

1. **Carlson JH, Porcella SF, McClarty G, Caldwell HD.** 2005. Comparative genomic analysis of *Chlamydia trachomatis* oculotropic and genitotropic strains. *Infect Immun*, **73**:6407–6418.
2. **Gomes JP, Bruno WJ, Borrego MJ, Dean D.** 2004. Recombination in the genome of *Chlamydia trachomatis* involving the polymorphic membrane protein C gene relative to *ompA* and evidence for horizontal gene transfer. *J. Bacteriol.* **186**:4295–4306.
3. **Gomes JP, Bruno WJ, Nunes A, Santos N, Florindo C, Borrego MJ, Dean D.** 2007. Evolution of *Chlamydia trachomatis* diversity occurs by widespread interstrain recombination involving hotspots. *Genome Res.* **17**:50–60.
4. **Gomes JP, Nunes A, Bruno WJ, Borrego MJ, Florindo C, Dean D.** 2006. Polymorphisms in the nine polymorphic membrane proteins of *Chlamydia trachomatis* across all serovars: evidence for serovar Da recombination and correlation with tissue tropism. *J. Bacteriol.* **188**:275–286.
5. **Harris SR, Clarke IN, Seth-Smith HM, Solomon AW, Cutcliffe LT, Marsh P, Skilton RJ, Holland MJ, Mabey D, Peeling RW, Lewis DA, Spratt BG, Unemo M, Persson K, Bjartling C, Brunham R, de Vries HJ, Morr e SA, Speksnijder A, B b ear CM, Clerc M, de Barbeyrac B,**

- Parkhill J, Thomson NR.** 2012. Whole-genome analysis of diverse *Chlamydia trachomatis* strains identifies phylogenetic relationships masked by current clinical typing. *Nat. Genet.* **44**:413–419.
6. **Jeffrey BM, Suchland RJ, Quinn KL, Davidson JR, Stamm WE, Rockey DD.** 2010. Genome sequencing of recent clinical *Chlamydia trachomatis* strains identifies loci associated with tissue tropism and regions of apparent recombination. *Infect. Immun.* **78**:2544–2553.
  7. **Millman KL, Tavaré S, Dean D.** 2001. Recombination in the *ompA* gene but not the *omcB* gene of *Chlamydia* contributes to serovar-specific differences in tissue tropism, immune surveillance, and persistence of the organism. *J. Bacteriol.* **183**:5997–6008.
  8. **Nunes A, Nogueira PJ, Borrego MJ, Gomes JP.** 2008. *Chlamydia trachomatis* diversity viewed as a tissue-specific coevolutionary arms race. *Genome Biol.* **9**:R153.
  9. **Read TD, Brunham RC, Shen C, Gill SR, Heidelberg JF, White O, Hickey EK, Peterson J, Utterback T, Berry K, Bass S, Linher K, Weidman J, Khouri H, Craven B, Bowman C, Dodson R, Gwinn M, Nelson W, DeBoy R, Kolonay J, McClarty G, Salzberg SL, Eisen J, Fraser CM.** 2000. Genome sequences of *Chlamydia trachomatis* MoPn and *Chlamydia pneumoniae* AR39. *Nucleic Acids Res.* **28**:1397–1406.
  10. **Seth-Smith HM, Harris SR, Persson K, Marsh P, Barron A, Bignell A, Bjartling C, Clark L, Cutcliffe LT, Lambden PR, Lennard N, Lockey SJ, Quail MA, Salim O, Skilton RJ, Wang Y, Holland MJ, Parkhill J, Thomson NR, Clarke IN.** 2009. Co-evolution of genomes and plasmids within *Chlamydia trachomatis* and the emergence in Sweden of a new variant strain. *BMC Genomics* **10**:239.
  11. **Somboonna N, Wan R, Ojcius DM, Pettengill MA, Joseph SJ, Chang A, Hsu R, Read TD, Dean D.** 2011. Hypervirulent *Chlamydia trachomatis* clinical strain is a recombinant between lymphogranuloma venereum (L(2)) and D lineages. *MBio* **2**:e00045-11.
  12. **Stephens RS, Kalman S, Lammel C, Fan J, Marathe R, Aravind L, Mitchell W, Olinger L, Tatusov RL, Zhao Q, Koonin EV, Davis RW.** 1998. Genome sequence of an obligate intracellular pathogen of humans: *Chlamydia trachomatis*. *Science* **282**:754–759.

13. Thomson NR, Holden MT, Carder C, Lennard N, Lockey SJ, Marsh P, Skipp P, O'Connor CD, Goodhead I, Norbertzcak H, Harris B, Ormond D, Rance R, Quail MA, Parkhill J, Stephens RS, Clarke IN. 2008. *Chlamydia trachomatis*: genome sequence analysis of lymphogranuloma venereum isolates. *Genome Res.* **18**:161–171.
14. Unemo M, Seth-Smith HM, Cutcliffe LT, Skilton RJ, Barlow D, Goulding D, Persson K, Harris SR, Kelly A, Bjartling C, Fredlund H, Olcén P, Thomson NR, Clarke IN. 2010. The Swedish new variant of *Chlamydia trachomatis*: genome sequence, morphology, cell tropism and phenotypic characterization. *Microbiology* **156**:139–1404.
